# Supplementary material for: Application of primary healthcare principles in national community health worker programmes in low-income and middle-income countries: a scoping review
Source: HighWire-hosted journal article supplement (doi:10.1136/bmjopen-2021-051940), 2022-02-01
Supplement: bmjopen-2021-051940supp002_data_supplement.pdf [file bmjopen-2021-051940supp002_data_supplement.pdf]

## Appendix I: Logic grids for information sources

### PubMed

| Search | Query                                                                                                                                                                                                                                                                                                                                                                                                                                                                                                                                                                                                                                                                                                                                                                                                                                                                                                                                                                                                                                                                                                                                                                                                                                                                                                                                                                                                                                                                                                          | Records retrieved |
|--------|----------------------------------------------------------------------------------------------------------------------------------------------------------------------------------------------------------------------------------------------------------------------------------------------------------------------------------------------------------------------------------------------------------------------------------------------------------------------------------------------------------------------------------------------------------------------------------------------------------------------------------------------------------------------------------------------------------------------------------------------------------------------------------------------------------------------------------------------------------------------------------------------------------------------------------------------------------------------------------------------------------------------------------------------------------------------------------------------------------------------------------------------------------------------------------------------------------------------------------------------------------------------------------------------------------------------------------------------------------------------------------------------------------------------------------------------------------------------------------------------------------------|-------------------|
| #1     | “community health workers”[mh] OR community health worker*[tiab] OR community health aide*[tiab] OR village health worker*[tiab] OR barefoot doctor*[tiab] OR family planning personnel*[tiab] OR health extension worker*[tiab] OR lady health worker*[tiab] OR community health agent*[tiab] OR Shasthyo Sebika*[tiab] OR community nutrition worker*[tiab] OR maternal health worker*[tiab] OR voluntary Malaria workers*[tiab] OR village malaria worker*[tiab] OR Raedat*[tiab] OR postnatal support worker*[tiab] OR mental health worker*[tiab] OR mother coordinator*[tiab] OR rural health worker*[tiab] OR village health promoter*[tiab] OR accompagnateur*[tiab] OR Saksham Sahaya*[tiab] OR anganwadi worker*[tiab] OR accredited social health activist*[tiab] OR community-based worker*[tiab] OR community health volunteer*[tiab] OR village health guide*[tiab] OR maternal and child health promotion worker*[tiab] OR maternal child health worker*[tiab] OR kader posyandu*[tiab] OR behvarz*[tiab] OR village health helper*[tiab] OR colaborador voluntario*[tiab] OR nutrition volunteers*[tiab] OR village drug-kit manager*[tiab] OR brigadistas*[tiab] OR female community health volunteer*[tiab] OR Agente Comunitario de Salud*[tiab] OR nutrition worker*[tiab] OR community reproductive health worker*[tiab] OR community drug distributor*[tiab] OR community volunteer*[tiab] OR community health advocate*[tiab] OR lay health visitor*[tiab] OR Promotoras de Salud[tiab] | 174984            |
| #2     | Program[tiab] OR programs[tiab] OR programme[tiab] OR programmes[tiab] OR initiative*[tiab] OR project[tiab] OR projects[tiab]                                                                                                                                                                                                                                                                                                                                                                                                                                                                                                                                                                                                                                                                                                                                                                                                                                                                                                                                                                                                                                                                                                                                                                                                                                                                                                                                                                                 | 959578            |
| #3     | “Maternal health”[mh] OR “Maternal Welfare”[mh] OR “child health”[mh] OR “child care”[mh] OR “child welfare”[mh] OR “maternal-child health services”[mh] OR “child health services”[mh:noexp] OR maternal child health[tiab] OR maternal newborn child health[tiab]                                                                                                                                                                                                                                                                                                                                                                                                                                                                                                                                                                                                                                                                                                                                                                                                                                                                                                                                                                                                                                                                                                                                                                                                                                            | 71349             |

| Search | Query                                                                                                                                                                                                                                                                                                                                                                                                                                                                                                                                                                                                                                                                                                                                                                                                                                                                                                                                                                                                                                                                                                                                                                                                                                                                                                                                                                                                                                                                                                                                                                                                                                                                                                                                                                                                                                                                                                                                                                                                                                                                                                                                                                                                                                                                                                                                                                                                                                                                                                                                                                                                                                                                                                                                                                                                                                                                                                                                                                                                                                                                                                                                                                                                                                                                                                                                                                                                                                                                                                                                                                                                                                                                                                                                                                                                                                                                                                                                                                                                                                                                                                                                                                                                                                                                                                                                                                                                                                                                                                                                                                                                                                                                                  | Records retrieved |
|--------|----------------------------------------------------------------------------------------------------------------------------------------------------------------------------------------------------------------------------------------------------------------------------------------------------------------------------------------------------------------------------------------------------------------------------------------------------------------------------------------------------------------------------------------------------------------------------------------------------------------------------------------------------------------------------------------------------------------------------------------------------------------------------------------------------------------------------------------------------------------------------------------------------------------------------------------------------------------------------------------------------------------------------------------------------------------------------------------------------------------------------------------------------------------------------------------------------------------------------------------------------------------------------------------------------------------------------------------------------------------------------------------------------------------------------------------------------------------------------------------------------------------------------------------------------------------------------------------------------------------------------------------------------------------------------------------------------------------------------------------------------------------------------------------------------------------------------------------------------------------------------------------------------------------------------------------------------------------------------------------------------------------------------------------------------------------------------------------------------------------------------------------------------------------------------------------------------------------------------------------------------------------------------------------------------------------------------------------------------------------------------------------------------------------------------------------------------------------------------------------------------------------------------------------------------------------------------------------------------------------------------------------------------------------------------------------------------------------------------------------------------------------------------------------------------------------------------------------------------------------------------------------------------------------------------------------------------------------------------------------------------------------------------------------------------------------------------------------------------------------------------------------------------------------------------------------------------------------------------------------------------------------------------------------------------------------------------------------------------------------------------------------------------------------------------------------------------------------------------------------------------------------------------------------------------------------------------------------------------------------------------------------------------------------------------------------------------------------------------------------------------------------------------------------------------------------------------------------------------------------------------------------------------------------------------------------------------------------------------------------------------------------------------------------------------------------------------------------------------------------------------------------------------------------------------------------------------------------------------------------------------------------------------------------------------------------------------------------------------------------------------------------------------------------------------------------------------------------------------------------------------------------------------------------------------------------------------------------------------------------------------------------------------------------------------------------|-------------------|
| #4     | ((developing country[tw] OR developing countries[tw] OR developing nation[tw] OR developing nations[tw] OR developing population[tw] OR developing populations[tw] OR developing world[tw] OR less developed country[tw] OR less developed countries[tw] OR less developed nation[tw] OR less developed nations[tw] OR less developed population[tw] OR less developed populations[tw] OR less developed world[tw] OR lesser developed country[tw] OR lesser developed countries[tw] OR lesser developed nation[tw] OR lesser developed nations[tw] OR lesser developed population[tw] OR lesser developed populations[tw] OR lesser developed world[tw] OR under developed country[tw] OR under developed countries[tw] OR under developed nation[tw] OR under developed nations[tw] OR under developed population[tw] OR under developed populations[tw] OR under developed world[tw] OR underdeveloped country[tw] OR underdeveloped countries[tw] OR underdeveloped nation[tw] OR underdeveloped nations[tw] OR underdeveloped population[tw] OR underdeveloped populations[tw] OR underdeveloped world[tw] OR middle income country[tw] OR middle income countries[tw] OR middle income nation[tw] OR middle income nations[tw] OR middle income population[tw] OR middle income populations[tw] OR low income country[tw] OR low income countries[tw] OR low income nation[tw] OR low income nations[tw] OR low income population[tw] OR low income populations[tw] OR lower income country[tw] OR lower income countries[tw] OR lower income nation[tw] OR lower income nations[tw] OR lower income population[tw] OR lower income populations[tw] OR underserved country[tw] OR underserved countries[tw] OR underserved nation[tw] OR underserved nations[tw] OR underserved population[tw] OR underserved populations[tw] OR under served country[tw] OR under served countries[tw] OR under served nation[tw] OR under served nations[tw] OR under served population[tw] OR under served populations[tw] OR under served world[tw] OR deprived country[tw] OR deprived countries[tw] OR deprived nation[tw] OR deprived nations[tw] OR deprived population[tw] OR deprived populations[tw] OR deprived world[tw] OR poor country[tw] OR poor countries[tw] OR poor nation[tw] OR poor nations[tw] OR poor population[tw] OR poor populations[tw] OR poor world[tw] OR poorer country[tw] OR poorer countries[tw] OR poorer nation[tw] OR poorer nations[tw] OR poorer population[tw] OR poorer populations[tw] OR poorer world[tw] OR developing economy[tw] OR developing economies[tw] OR less developed economy[tw] OR less developed economies[tw] OR lesser developed economy[tw] OR lesser developed economies[tw] OR under developed economy[tw] OR under developed economies[tw] OR underdeveloped economy[tw] OR underdeveloped economies[tw] OR middle income economy[tw] OR middle income economies[tw] OR low income economy[tw] OR low income economies[tw] OR lower income economy[tw] OR lower income economies[tw] OR low gdp[tw] OR low gnp[tw] OR low gross domestic[tw] OR low gross national[tw] OR lower gdp[tw] OR lower gnp[tw] OR lower gross domestic[tw] OR lower gross national[tw] OR lmic[tw] OR lmic[tw] OR third world[tw] OR lami country[tw] OR lami countries[tw] OR transitional country[tw] OR transitional countries[tw] OR (Africa[tw] OR Asia[tw] OR Caribbean[tw] OR West Indies[tw] OR South America[tw] OR Latin America[tw] OR Central America[tw] OR Afghanistan[tw] OR Albania[tw] OR Algeria[tw] OR Angola[tw] OR Antigua[tw] OR Barbuda[tw] OR Argentina[tw] OR Armenia[tw] OR Armenian[tw] OR Aruba[tw] OR Azerbaijan[tw] OR Bahrain[tw] OR Bangladesh[tw] OR Barbados[tw] OR Benin[tw] OR Byelarus[tw] OR Byelorussian[tw] OR Belarus[tw] OR Belorussian[tw] OR Belorussia[tw] OR Belize[tw] OR Bhutan[tw] OR Bolivia[tw] OR Bosnia[tw] OR Herzegovina[tw] OR Hercegovina[tw] OR Botswana[tw] OR Brasil[tw] OR Brazil[tw] OR Bulgaria[tw] OR Burkina Faso[tw] OR Burkina Fasso[tw] OR Upper Volta[tw] OR Burundi[tw] OR Urundi[tw] OR Cambodia[tw] OR Khmer Republic[tw] OR Kampuchea[tw] OR Cameroon[tw] OR Cameroons[tw] OR Cameron[tw] OR Camerons[tw] OR Cape Verde[tw] OR Central African Republic[tw] OR Chad[tw] OR Chile[tw] OR China[tw] OR Colombia[tw] OR Comoros[tw] OR Comoro Islands[tw] OR Comores[tw] OR Mayotte[tw] OR Congo[tw] OR Zaire[tw] OR Costa Rica[tw] OR Cote d'Ivoire[tw] OR Ivory Coast[tw] OR Croatia[tw] OR Cuba[tw] OR Cyprus[tw] OR Czechoslovakia[tw] OR Czech Republic[tw] OR Slovakia[tw] OR Slovak Republic[tw] OR Djibouti[tw] OR French Somaliland[tw] OR Dominica[tw] OR Dominican | 1903167           |

| Search | Query                                                                                                                                                                                                                                                                                                                                                                                                                                                                                                                                                                                                                                                                                                                                                                                                                                                                                                                                                                                                                                                                                                                                                                                                                                                                                                                                                                                                                                                                                                                                                                                                                                                                                                                                                                                                                                                                                                                                                                                                                                                                                                                                                                                                                                                                                                                                                                                                                                                                                                                                                                                                                                                                                                                                                                                                                                                                                                                                                                                                                                                                                                                                                                                                                                                                                                                                                                                                                                                                                                                                                                                                                                                                                                                                                                                                                                                                                                                                                                                                                                                                                                                                                                                                                                                                                                                                                                                                                                                                                                                                         | Records retrieved |
|--------|-----------------------------------------------------------------------------------------------------------------------------------------------------------------------------------------------------------------------------------------------------------------------------------------------------------------------------------------------------------------------------------------------------------------------------------------------------------------------------------------------------------------------------------------------------------------------------------------------------------------------------------------------------------------------------------------------------------------------------------------------------------------------------------------------------------------------------------------------------------------------------------------------------------------------------------------------------------------------------------------------------------------------------------------------------------------------------------------------------------------------------------------------------------------------------------------------------------------------------------------------------------------------------------------------------------------------------------------------------------------------------------------------------------------------------------------------------------------------------------------------------------------------------------------------------------------------------------------------------------------------------------------------------------------------------------------------------------------------------------------------------------------------------------------------------------------------------------------------------------------------------------------------------------------------------------------------------------------------------------------------------------------------------------------------------------------------------------------------------------------------------------------------------------------------------------------------------------------------------------------------------------------------------------------------------------------------------------------------------------------------------------------------------------------------------------------------------------------------------------------------------------------------------------------------------------------------------------------------------------------------------------------------------------------------------------------------------------------------------------------------------------------------------------------------------------------------------------------------------------------------------------------------------------------------------------------------------------------------------------------------------------------------------------------------------------------------------------------------------------------------------------------------------------------------------------------------------------------------------------------------------------------------------------------------------------------------------------------------------------------------------------------------------------------------------------------------------------------------------------------------------------------------------------------------------------------------------------------------------------------------------------------------------------------------------------------------------------------------------------------------------------------------------------------------------------------------------------------------------------------------------------------------------------------------------------------------------------------------------------------------------------------------------------------------------------------------------------------------------------------------------------------------------------------------------------------------------------------------------------------------------------------------------------------------------------------------------------------------------------------------------------------------------------------------------------------------------------------------------------------------------------------------------------------------|-------------------|
|        | Republic[tw] OR East Timor[tw] OR East Timur[tw] OR Timor Leste[tw] OR Ecuador[tw] OR Egypt[tw] OR United Arab Republic[tw] OR El Salvador[tw] OR Eritrea[tw] OR Estonia[tw] OR Ethiopia[tw] OR Fiji[tw] OR Gabon[tw] OR Gabonese Republic[tw] OR Gambia[tw] OR Gaza[tw] OR Georgia Republic[tw] OR Georgian Republic[tw] OR Ghana[tw] OR Gold Coast[tw] OR Greece[tw] OR Grenada[tw] OR Guatemala[tw] OR Guinea[tw] OR Guam[tw] OR Guiana[tw] OR Guyana[tw] OR Haiti[tw] OR Honduras[tw] OR Hungary[tw] OR India[tw] OR Maldives[tw] OR Indonesia[tw] OR Iran[tw] OR Iraq[tw] OR Isle of Man[tw] OR Jamaica[tw] OR Jordan[tw] OR Kazakhstan[tw] OR Kazakh[tw] OR Kenya[tw] OR Kiribati[tw] OR Korea[tw] OR Kosovo[tw] OR Kyrgyzstan[tw] OR Kirghizia[tw] OR Kyrgyz Republic[tw] OR Kirghiz[tw] OR Kirgizstan[tw] OR Lao PDR[tw] OR Laos[tw] OR Latvia[tw] OR Lebanon[tw] OR Lesotho[tw] OR Basutoland[tw] OR Liberia[tw] OR Libya[tw] OR Lithuania[tw] OR (Macedonia[tw] OR Madagascar[tw] OR Malagasy Republic[tw] OR Malaysia[tw] OR Malaya[tw] OR Malay[tw] OR Sabah[tw] OR Sarawak[tw] OR Malawi[tw] OR Nyasaland[tw] OR Mali[tw] OR Malta[tw] OR Marshall Islands[tw] OR Mauritania[tw] OR Mauritius[tw] OR Agalega Islands[tw] OR Mexico[tw] OR Micronesia[tw] OR Middle East[tw] OR Moldova[tw] OR Moldovia[tw] OR Moldovian[tw] OR Mongolia[tw] OR Montenegro[tw] OR Morocco[tw] OR Ifni[tw] OR Mozambique[tw] OR Myanmar[tw] OR Myanma[tw] OR Burma[tw] OR Namibia[tw] OR Nepal[tw] OR Netherlands Antilles[tw] OR New Caledonia[tw] OR Nicaragua[tw] OR Niger[tw] OR Nigeria[tw] OR Northern Mariana Islands[tw] OR Oman[tw] OR Muscat[tw] OR Pakistan[tw] OR Palau[tw] OR Palestine[tw] OR Panama[tw] OR Paraguay[tw] OR Peru[tw] OR Philippines[tw] OR Philipines[tw] OR Phillipines[tw] OR Phillipines[tw] OR Phillippines[tw] OR Poland[tw] OR Portugal[tw] OR Puerto Rico[tw] OR Romania[tw] OR Rumania[tw] OR Roumania[tw] OR Russia[tw] OR Russian[tw] OR Rwanda[tw] OR Ruanda[tw] OR Saint Kitts[tw] OR St Kitts[tw] OR Nevis[tw] OR Saint Lucia[tw] OR St Lucia[tw] OR Saint Vincent[tw] OR St Vincent[tw] OR Grenadines[tw] OR Samoa[tw] OR Samoan Islands[tw] OR Navigator Island[tw] OR Navigator Islands[tw] OR Sao Tome[tw] OR Saudi Arabia[tw] OR Senegal[tw] OR Serbia[tw] OR Montenegro[tw] OR Seychelles[tw] OR Sierra Leone[tw] OR Slovenia[tw] OR Sri Lanka[tw] OR Ceylon[tw] OR Solomon Islands[tw] OR Somalia[tw] OR Sudan[tw] OR Suriname[tw] OR Surinam[tw] OR Swaziland[tw] OR Syria[tw] OR Tajikistan[tw] OR Tadjikistan[tw] OR Tadjikistan[tw] OR Tadjhik[tw] OR Tanzania[tw] OR Thailand[tw] OR Togo[tw] OR Togolese Republic[tw] OR Tonga[tw] OR Trinidad[tw] OR Tobago[tw] OR Tunisia[tw] OR Turkey[tw] OR Turkmenistan[tw] OR Turkmen[tw] OR Uganda[tw] OR Ukraine[tw] OR Uruguay[tw] OR USSR[tw] OR Soviet Union[tw] OR Union of Soviet Socialist Republics[tw] OR Uzbekistan[tw] OR Uzbek OR Vanuatu[tw] OR New Hebrides[tw] OR Venezuela[tw] OR Vietnam[tw] OR Viet Nam[tw] OR West Bank[tw] OR Yemen[tw] OR Yugoslavia[tw] OR Zambia[tw] OR Zimbabwe[tw] OR Rhodesia[tw] OR (Developing Countries[Mesh:noexp] OR Africa[Mesh:noexp] OR Africa, Northern[Mesh:noexp] OR Africa South of the Sahara[Mesh:noexp] OR Africa, Central[Mesh:noexp] OR Africa, Eastern[Mesh:noexp] OR Africa, Southern[Mesh:noexp] OR Africa, Western[Mesh:noexp] OR Asia[Mesh:noexp] OR Asia, Central[Mesh:noexp] OR Asia, Southeastern[Mesh:noexp] OR Asia, Western[Mesh:noexp] OR Caribbean Region[Mesh:noexp] OR West Indies[Mesh:noexp] OR South America[Mesh:noexp] OR Latin America[Mesh:noexp] OR Central America[Mesh:noexp] OR Afghanistan[Mesh:noexp] OR Albania[Mesh:noexp] OR Algeria[Mesh:noexp] OR American Samoa[Mesh:noexp] OR Angola[Mesh:noexp] OR "Antigua and Barbuda"[Mesh:noexp] OR Argentina[Mesh:noexp] OR Armenia[Mesh:noexp] OR Azerbaijan[Mesh:noexp] OR Bahrain[Mesh:noexp] OR Bangladesh[Mesh:noexp] OR Barbados[Mesh:noexp] OR Benin[Mesh:noexp] OR Byelarus[Mesh:noexp] OR Belize[Mesh:noexp] OR Bhutan[Mesh:noexp] OR Bolivia[Mesh:noexp] OR Bosnia-Herzegovina[Mesh:noexp] OR Botswana[Mesh:noexp] OR Brazil[Mesh:noexp] OR Bulgaria[Mesh:noexp] OR Burkina Faso[Mesh:noexp] OR Burundi[Mesh:noexp] OR Cambodia[Mesh:noexp] OR Cameroon[Mesh:noexp] OR Cape Verde[Mesh:noexp] OR Central African Republic[Mesh:noexp] OR Chad[Mesh:noexp] OR Chile[Mesh:noexp] OR China[Mesh:noexp] OR Colombia[Mesh:noexp] OR Comoros[Mesh:noexp] OR Congo[Mesh:noexp] OR Costa Rica[Mesh:noexp] OR |                   |

| Search | Query                                                                                                                                                                                                                                                                                                                                                                                                                                                                                                                                                                                                                                                                                                                                                                                                                                                                                                                                                                                                                                                                                                                                                                                                                                                                                                                                                                                                                                                                                                                                                                                                                                                                                                                                                                                                                                                                                                                                                                                                                                                                                                                                                                                                                                                                                                                                                                                                                                                                                                                                                                                                                                                                                                                                                                                                                                                                                                                                                                                                                                                                                                                                                                                                                                                                                          | Records retrieved |
|--------|------------------------------------------------------------------------------------------------------------------------------------------------------------------------------------------------------------------------------------------------------------------------------------------------------------------------------------------------------------------------------------------------------------------------------------------------------------------------------------------------------------------------------------------------------------------------------------------------------------------------------------------------------------------------------------------------------------------------------------------------------------------------------------------------------------------------------------------------------------------------------------------------------------------------------------------------------------------------------------------------------------------------------------------------------------------------------------------------------------------------------------------------------------------------------------------------------------------------------------------------------------------------------------------------------------------------------------------------------------------------------------------------------------------------------------------------------------------------------------------------------------------------------------------------------------------------------------------------------------------------------------------------------------------------------------------------------------------------------------------------------------------------------------------------------------------------------------------------------------------------------------------------------------------------------------------------------------------------------------------------------------------------------------------------------------------------------------------------------------------------------------------------------------------------------------------------------------------------------------------------------------------------------------------------------------------------------------------------------------------------------------------------------------------------------------------------------------------------------------------------------------------------------------------------------------------------------------------------------------------------------------------------------------------------------------------------------------------------------------------------------------------------------------------------------------------------------------------------------------------------------------------------------------------------------------------------------------------------------------------------------------------------------------------------------------------------------------------------------------------------------------------------------------------------------------------------------------------------------------------------------------------------------------------------|-------------------|
|        | Cote d'Ivoire[Mesh:noexp] OR Croatia[Mesh:noexp] OR Cuba[Mesh:noexp] OR Cyprus[Mesh:noexp] OR Czechoslovakia[Mesh:noexp] OR Czech Republic[Mesh:noexp] OR Slovakia[Mesh:noexp] OR Djibouti[Mesh:noexp] OR "Democratic Republic of the Congo"[Mesh:noexp] OR Dominica[Mesh:noexp] OR Dominican Republic[Mesh:noexp] OR East Timor[Mesh:noexp] OR Ecuador[Mesh:noexp] OR Egypt[Mesh:noexp] OR El Salvador[Mesh:noexp] OR Eritrea[Mesh:noexp] OR Estonia[Mesh:noexp] OR Ethiopia[Mesh:noexp] OR Fiji[Mesh:noexp] OR Gabon[Mesh:noexp] OR Gambia[Mesh:noexp] OR "Georgia (Republic)"[Mesh:noexp] OR Ghana[Mesh:noexp] OR Greece[Mesh:noexp] OR Grenada[Mesh:noexp] OR Guatemala[Mesh:noexp] OR Guinea[Mesh:noexp] OR Guinea-Bissau[Mesh:noexp] OR Guam[Mesh:noexp] OR Guyana[Mesh:noexp] OR Haiti[Mesh:noexp] OR Honduras[Mesh:noexp] OR Hungary[Mesh:noexp] OR India[Mesh:noexp] OR Indonesia[Mesh:noexp] OR Iran[Mesh:noexp] OR Iraq[Mesh:noexp] OR Jamaica[Mesh:noexp] OR Jordan[Mesh:noexp] OR Kazakhstan[Mesh:noexp] OR Kenya[Mesh:noexp] OR Korea[Mesh:noexp] OR Kosovo[Mesh:noexp] OR Kyrgyzstan[Mesh:noexp] OR Laos[Mesh:noexp] OR Latvia[Mesh:noexp] OR Lebanon[Mesh:noexp] OR Lesotho[Mesh:noexp] OR Liberia[Mesh:noexp] OR Libya[Mesh:noexp] OR Lithuania[Mesh:noexp] OR Macedonia[Mesh:noexp] OR Madagascar[Mesh:noexp] OR Malaysia[Mesh:noexp] OR Malawi[Mesh:noexp] OR Mali[Mesh:noexp] OR Malta[Mesh:noexp] OR Mauritania[Mesh:noexp] OR Mauritius[Mesh:noexp] OR Mexico[Mesh:noexp] OR Micronesia[Mesh:noexp] OR Middle East[Mesh:noexp] OR Moldova[Mesh:noexp] OR Mongolia[Mesh:noexp] OR Montenegro[Mesh:noexp] OR Morocco[Mesh:noexp] OR Mozambique[Mesh:noexp] OR Myanmar[Mesh:noexp] OR Namibia[Mesh:noexp] OR Nepal[Mesh:noexp] OR Netherlands Antilles[Mesh:noexp] OR New Caledonia[Mesh:noexp] OR Nicaragua[Mesh:noexp] OR Niger[Mesh:noexp] OR Nigeria[Mesh:noexp] OR Oman[Mesh:noexp] OR Pakistan[Mesh:noexp] OR Palau[Mesh:noexp] OR Panama[Mesh:noexp] OR Papua New Guinea[Mesh:noexp] OR Paraguay[Mesh:noexp] OR Peru[Mesh:noexp] OR Philippines[Mesh:noexp] OR Poland[Mesh:noexp] OR Portugal[Mesh:noexp] OR Puerto Rico[Mesh:noexp] OR Romania[Mesh:noexp] OR Russia[Mesh:noexp] OR "Russia (Pre-1917)"[Mesh:noexp] OR Rwanda[Mesh:noexp] OR "Saint Kitts and Nevis"[Mesh:noexp] OR Saint Lucia[Mesh:noexp] OR "Saint Vincent and the Grenadines"[Mesh:noexp] OR Samoa[Mesh:noexp] OR Saudi Arabia[Mesh:noexp] OR Senegal[Mesh:noexp] OR Serbia[Mesh:noexp] OR Montenegro[Mesh:noexp] OR Seychelles[Mesh:noexp] OR Sierra Leone[Mesh:noexp] OR Slovenia[Mesh:noexp] OR Sri Lanka[Mesh:noexp] OR Somalia[Mesh:noexp] OR South Africa[Mesh:noexp] OR Sudan[Mesh:noexp] OR Suriname[Mesh:noexp] OR Swaziland[Mesh:noexp] OR Syria[Mesh:noexp] OR Tajikistan[Mesh:noexp] OR Tanzania[Mesh:noexp] OR Thailand[Mesh:noexp] OR Togo[Mesh:noexp] OR Tonga[Mesh:noexp] OR "Trinidad and Tobago"[Mesh:noexp] OR Tunisia[Mesh:noexp] OR Turkey[Mesh:noexp] OR Turkmenistan[Mesh:noexp] OR Uganda[Mesh:noexp] OR Ukraine[Mesh:noexp] OR Uruguay[Mesh:noexp] OR USSR[Mesh:noexp] OR Uzbekistan[Mesh:noexp] OR Vanuatu[Mesh:noexp] OR Venezuela[Mesh:noexp] OR Vietnam[Mesh:noexp] OR Yemen[Mesh:noexp] OR Yugoslavia[Mesh:noexp] OR Zambia[Mesh:noexp] OR Zimbabwe[Mesh:noexp])) |                   |
| #5     | #1 AND #2 AND #3 AND #4                                                                                                                                                                                                                                                                                                                                                                                                                                                                                                                                                                                                                                                                                                                                                                                                                                                                                                                                                                                                                                                                                                                                                                                                                                                                                                                                                                                                                                                                                                                                                                                                                                                                                                                                                                                                                                                                                                                                                                                                                                                                                                                                                                                                                                                                                                                                                                                                                                                                                                                                                                                                                                                                                                                                                                                                                                                                                                                                                                                                                                                                                                                                                                                                                                                                        | 956               |
|        | Limited to 1978 onwards in English language only                                                                                                                                                                                                                                                                                                                                                                                                                                                                                                                                                                                                                                                                                                                                                                                                                                                                                                                                                                                                                                                                                                                                                                                                                                                                                                                                                                                                                                                                                                                                                                                                                                                                                                                                                                                                                                                                                                                                                                                                                                                                                                                                                                                                                                                                                                                                                                                                                                                                                                                                                                                                                                                                                                                                                                                                                                                                                                                                                                                                                                                                                                                                                                                                                                               | 863               |

**CINAHL**

| Community health worker                                                                                                                                                                                                                                                                                                                                                                                                                                                                                                                                                                                                                                                                                                                                                                                                                                                                                                                                                                                                                                                                                                                                                                                                                                                                                                                                                                         | Program                                                                                                   | MCH                                                      | LMIC                                                                                                                                                                                                                                                                                                                                                                                                                                                                                                                                                                                                                                                                                                                                                                                                                                                                                                                                                                                                                                                                                                                                                                                                                                                                                                                                                                                                                                                                                                                                                                                                                                                                                                                                                                                                                                                                                                                                                                                                                                           |
|-------------------------------------------------------------------------------------------------------------------------------------------------------------------------------------------------------------------------------------------------------------------------------------------------------------------------------------------------------------------------------------------------------------------------------------------------------------------------------------------------------------------------------------------------------------------------------------------------------------------------------------------------------------------------------------------------------------------------------------------------------------------------------------------------------------------------------------------------------------------------------------------------------------------------------------------------------------------------------------------------------------------------------------------------------------------------------------------------------------------------------------------------------------------------------------------------------------------------------------------------------------------------------------------------------------------------------------------------------------------------------------------------|-----------------------------------------------------------------------------------------------------------|----------------------------------------------------------|------------------------------------------------------------------------------------------------------------------------------------------------------------------------------------------------------------------------------------------------------------------------------------------------------------------------------------------------------------------------------------------------------------------------------------------------------------------------------------------------------------------------------------------------------------------------------------------------------------------------------------------------------------------------------------------------------------------------------------------------------------------------------------------------------------------------------------------------------------------------------------------------------------------------------------------------------------------------------------------------------------------------------------------------------------------------------------------------------------------------------------------------------------------------------------------------------------------------------------------------------------------------------------------------------------------------------------------------------------------------------------------------------------------------------------------------------------------------------------------------------------------------------------------------------------------------------------------------------------------------------------------------------------------------------------------------------------------------------------------------------------------------------------------------------------------------------------------------------------------------------------------------------------------------------------------------------------------------------------------------------------------------------------------------|
| MH “community health workers” OR MH “rural health personnel” OR TX “community health worker*” OR TX “community health aide*” OR TX “village health worker*” OR TX “barefoot doctor*” OR TX “family planning personnel*” OR TX “health extension worker*” OR TX “lady health worker*” OR TX “community health agent*” OR TX “Shasthyo Sebika*” OR TX “community nutrition worker*” OR TX “maternal health worker*” OR TX “voluntary Malaria worker*” OR TX “village malaria worker*” OR TX “Raedat*” OR TX “postnatal support worker*” OR TX “mental health worker*” OR TX “mother coordinator*” OR TX “rural health worker*” OR TX “village health promoter*” OR TX accompagnateur* OR TX “Saksham Sahaya*” OR TX “anganwandi worker*” OR TX “accredited social health activist*” OR TX “community-based worker*” OR TX “community health volunteer*” OR TX “village health guide*” OR TX “maternal and child health promotion worker*” OR TX “maternal child health worker*” OR TX “kader posyandu*” OR TX behvarz* OR TX “village health helper*” OR TX “colaborador voluntario*” OR TX “nutrition volunteers*” OR TX “village drug-kit manager*” OR TX brigadistas* OR TX “female community health volunteer*” OR TX “Agente Comunitario de Salud*” OR TX “nutrition worker*” OR TX “community reproductive health worker*” OR TX “community drug distributor*” OR TX “community volunteer*” | TX Program OR TX programs OR TX programme OR TX programmes OR TX initiative* OR TX project OR TX projects | MH “Maternal-Child Health” OR TX “maternal-child health” | MH “low and middle income countries” OR MH “developing countries” OR TX Afghanistan OR TX Albania OR TX Algeria OR TX Angola OR TX Antigua OR TX Barbuda OR TX Argentina OR TX Armenia OR TX Armenian OR TX Aruba OR TX Azerbaijan OR TX Bahrain OR TX Bangladesh OR TX Barbados OR TX Benin OR TX Byelarus OR TX Byelorussian OR TX Belarus OR TX Belorussian OR TX Belorussia OR TX Belize OR TX Bhutan OR TX Bolivia OR TX Bosnia OR TX Herzegovina OR TX Hercegovina OR TX Botswana OR TX Brasil OR TX Brazil OR TX Bulgaria OR TX Burkina Faso OR TX Burkina Fasso OR TX Upper Volta OR TX Burundi OR TX Urundi OR TX Cambodia OR TX Khmer Republic OR TX Kampuchea OR TX Cameroon OR TX Cameroons OR TX Cameron OR TX Camerons OR TX Cape Verde OR TX “Central African Republic” OR TX Chad OR TX Chile OR TX China OR TX Colombia OR TX Comoros OR TX “Comoro Islands” OR TX Comores OR TX Mayotte OR TX Congo OR TX Zaire OR TX “Costa Rica” OR TX “Cote d'Ivoire” OR TX “Ivory Coast” OR TX Croatia OR TX Cuba OR TX Cyprus OR TX Czechoslovakia OR TX “Czech Republic” OR TX Slovakia OR TX “Slovak Republic” OR TX Djibouti OR TX “French Somaliland” OR TX Dominica OR TX “Dominican Republic” OR TX “East Timor” OR TX “East Timur” OR TX “Timor Leste” OR TX Ecuador OR TX Egypt OR TX “United Arab Republic” OR TX “El Salvador” OR TX Eritrea OR TX Estonia OR TX Ethiopia OR TX Fiji OR TX Gabon OR TX “Gabonese Republic” OR TX Gambia OR TX Gaza OR TX “Georgia Republic” OR TX “Georgian Republic” OR TX Ghana OR TX “Gold Coast” OR TX Greece OR TX Grenada OR TX Guatemala OR TX Guinea OR TX Guam OR TX Guiana OR TX Guyana OR TX Haiti OR TX Honduras OR TX Hungary OR TX India OR TX Maldives OR TX Indonesia OR TX Iran OR TX Iraq OR TX “Isle of Man” OR TX Jamaica OR TX Jordan OR TX Kazakhstan OR TX Kazakh OR TX Kenya OR TX Kiribati OR TX Korea OR TX Kosovo OR TX Kyrgyzstan OR TX Kirghizia OR TX “Kyrgyz Republic” OR TX Kirghiz OR TX Kirgizstan OR TX “Lao PDR” OR TX Laos OR TX Latvia OR TX Lebanon OR |

| Community health worker                                                                    | Program | MCH | LMIC                                                                                                                                                                                                                                                                                                                                                                                                                                                                                                                                                                                                                                                                                                                                                                                                                                                                                                                                                                                                                                                                                                                                                                                                                                                                                                                                                                                                                                                                                                                                                                                                                                                                                                                                                                                                                                                                                                                                                                                                                                                                                                                                            |
|--------------------------------------------------------------------------------------------|---------|-----|-------------------------------------------------------------------------------------------------------------------------------------------------------------------------------------------------------------------------------------------------------------------------------------------------------------------------------------------------------------------------------------------------------------------------------------------------------------------------------------------------------------------------------------------------------------------------------------------------------------------------------------------------------------------------------------------------------------------------------------------------------------------------------------------------------------------------------------------------------------------------------------------------------------------------------------------------------------------------------------------------------------------------------------------------------------------------------------------------------------------------------------------------------------------------------------------------------------------------------------------------------------------------------------------------------------------------------------------------------------------------------------------------------------------------------------------------------------------------------------------------------------------------------------------------------------------------------------------------------------------------------------------------------------------------------------------------------------------------------------------------------------------------------------------------------------------------------------------------------------------------------------------------------------------------------------------------------------------------------------------------------------------------------------------------------------------------------------------------------------------------------------------------|
| OR TX "community health advocate*" OR TX "lay health visitor*" OR TX "Promotoras de Salud" |         |     | TX Lesotho OR TX Basutoland OR TX Liberia OR TX Libya OR TX Lithuania OR TX Macedonia OR TX Madagascar OR TX "Malagasy Republic" OR TX Malaysia OR TX Malaya OR TX Malay OR TX Sabah OR TX Sarawak OR TX Malawi OR TX Nyasaland OR TX Mali OR TX Malta OR TX "Marshall Islands" OR TX Mauritania OR TX Mauritius OR TX "Agalega Islands" OR TX Mexico OR TX Micronesia OR TX "Middle East" OR TX Moldova OR TX Moldova OR TX Moldovan OR TX Mongolia OR TX Montenegro OR TX Morocco OR TX Ifni OR TX Mozambique OR TX Myanmar OR TX Myanma OR TX Burma OR TX Namibia OR TX Nepal OR TX "Netherlands Antilles" OR TX "New Caledonia" OR TX Nicaragua OR TX Niger OR TX Nigeria OR TX "Northern Mariana Islands" OR TX Oman OR TX Muscat OR TX Pakistan OR TX Palau OR TX Palestine OR TX Panama OR TX Paraguay OR TX Peru OR TX Philippines OR TX Philipines OR TX Phillipines OR TX Phillipines OR TX Poland OR TX Portugal OR TX "Puerto Rico" OR TX Romania OR TX Rumania OR TX Roumania OR TX Russia OR TX Russian OR TX Rwanda OR TX Ruanda OR TX "Saint Kitts" OR TX "St Kitts" OR TX Nevis OR TX "Saint Lucia" OR TX "St Lucia" OR TX "Saint Vincent" OR TX "St Vincent" OR TX Grenadines OR TX Samoa OR TX "Samoan Islands" OR TX "Navigator Island" OR TX "Navigator Islands" OR TX "Sao Tome" OR TX "Saudi Arabia" OR TX Senegal OR TX Serbia OR TX Montenegro OR TX Seychelles OR TX "Sierra Leone" OR TX Slovenia OR TX "Sri Lanka" OR TX Ceylon OR TX "Solomon Islands" OR TX Somalia OR TX Sudan OR TX Suriname OR TX Surinam OR TX Swaziland OR TX Syria OR TX Tajikistan OR TX Tadjhikistan OR TX Tadjikistan OR TX Tadjhik OR TX Tanzania OR TX Thailand OR TX Togo OR TX "Togolese Republic" OR TX Tonga OR TX Trinidad OR TX Tobago OR TX Tunisia OR TX Turkey OR TX Turkmenistan OR TX Turkmen OR TX Uganda OR TX Ukraine OR TX Uruguay OR TX USSR OR TX "Soviet Union" OR TX "Union of Soviet Socialist Republics" OR TX Uzbekistan OR TX Uzbek OR TX Vanuatu OR TX "New Hebrides" OR TX Venezuela OR TX Vietnam OR TX "Viet Nam" OR TX "West Bank" OR TX Yemen OR TX Yugoslavia OR TX Zambia OR TX Zimbabwe OR TX Rhodesia |



**EMBASE**

| Community health worker                                                                                                                                                                                                                                                                                                                                                                                                                                                                                                                                                                                                                                                                                                                                                                                                                                                                                                                                                                                                                                                                                                                                                                                                       | Program                                                                                                                                                         | MCH                                                                                                                                                                                                                                                                                                                                           | LMIC                                                                                                                                                                                                                                                                                                                                                                                                                                                                                                                                                                                                                                                                                                                                                                                                                                                                                                                                                                                                                                                                                                                                                                                                                                                                                                                                                                                                                                                                                                                                                                                                                                                                                                                                                                                                                                                                                                                                                                                                                                                                                                                                                                                                                                                                                                                                                                                                                                                                                                                                                                                                                                                                  |
|-------------------------------------------------------------------------------------------------------------------------------------------------------------------------------------------------------------------------------------------------------------------------------------------------------------------------------------------------------------------------------------------------------------------------------------------------------------------------------------------------------------------------------------------------------------------------------------------------------------------------------------------------------------------------------------------------------------------------------------------------------------------------------------------------------------------------------------------------------------------------------------------------------------------------------------------------------------------------------------------------------------------------------------------------------------------------------------------------------------------------------------------------------------------------------------------------------------------------------|-----------------------------------------------------------------------------------------------------------------------------------------------------------------|-----------------------------------------------------------------------------------------------------------------------------------------------------------------------------------------------------------------------------------------------------------------------------------------------------------------------------------------------|-----------------------------------------------------------------------------------------------------------------------------------------------------------------------------------------------------------------------------------------------------------------------------------------------------------------------------------------------------------------------------------------------------------------------------------------------------------------------------------------------------------------------------------------------------------------------------------------------------------------------------------------------------------------------------------------------------------------------------------------------------------------------------------------------------------------------------------------------------------------------------------------------------------------------------------------------------------------------------------------------------------------------------------------------------------------------------------------------------------------------------------------------------------------------------------------------------------------------------------------------------------------------------------------------------------------------------------------------------------------------------------------------------------------------------------------------------------------------------------------------------------------------------------------------------------------------------------------------------------------------------------------------------------------------------------------------------------------------------------------------------------------------------------------------------------------------------------------------------------------------------------------------------------------------------------------------------------------------------------------------------------------------------------------------------------------------------------------------------------------------------------------------------------------------------------------------------------------------------------------------------------------------------------------------------------------------------------------------------------------------------------------------------------------------------------------------------------------------------------------------------------------------------------------------------------------------------------------------------------------------------------------------------------------------|
| "Health Auxiliary"/de OR<br>"community health worker*":ti,ab<br>OR "community health aide*":ti,ab<br>OR "village health worker*":ti,ab OR<br>"barefoot doctor*":ti,ab OR "family<br>planning personnel*":ti,ab OR<br>"health extension worker*":ti,ab OR<br>"lady health worker*":ti,ab OR<br>"community health agent*":ti,ab OR<br>"Shasthyo Sebika*":ti,ab OR<br>"community nutrition worker*":ti,ab<br>OR "maternal health worker*":ti,ab<br>OR "voluntary Malaria worker*":ti,ab<br>OR "village malaria worker*":ti,ab<br>OR Raedat*":ti,ab OR "postnatal<br>support worker*":ti,ab OR "mental<br>health worker*":ti,ab OR "mother<br>coordinator*":ti,ab OR "rural health<br>worker*":ti,ab OR "village health<br>promoter*":ti,ab OR<br>accompagnateur*":ti,ab OR<br>"Saksham Sahaya*":ti,ab OR<br>"anganwadi worker*":ti,ab OR<br>"accredited social health<br>activist*":ti,ab OR "community-<br>based worker*":ti,ab OR<br>"community health volunteer*":ti,ab<br>OR "village health guide*":ti,ab OR<br>"maternal and child health<br>promotion worker*":ti,ab OR<br>"maternal child health worker*":ti,ab<br>OR "kader posyandu*":ti,ab OR<br>behvarz*":ti,ab OR "village health<br>helper*":ti,ab OR "colaborador | Program:ti,ab<br>OR<br>programs:ti,ab<br>OR<br>programme:ti,ab<br>OR<br>programmes:ti,ab<br>OR<br>initiative*:ti,ab<br>OR project:ti,ab<br>OR<br>projects:ti,ab | "Maternal child<br>health care"/de<br>OR "Maternal<br>Welfare":ti,ab OR<br>"child health":ti,ab<br>OR "child<br>care":ti,ab OR<br>"child<br>welfare":ti,ab OR<br>"maternal-child<br>health<br>services":ti,ab OR<br>"child health<br>services":ti,ab OR<br>"maternal child<br>health":ti,ab OR<br>"maternal<br>newborn child<br>health":ti,ab | Afghanistan:ti,ab OR Albania:ti,ab OR Algeria:ti,ab OR Angola:ti,ab OR<br>Antigua:ti,ab OR Barbuda:ti,ab OR Argentina:ti,ab OR Armenia:ti,ab OR<br>Armenian:ti,ab OR Aruba:ti,ab OR Azerbaijan:ti,ab OR Bahrain:ti,ab OR<br>Bangladesh:ti,ab OR Barbados:ti,ab OR Benin:ti,ab OR Byelarus:ti,ab OR<br>Byelorussian:ti,ab OR Belarus:ti,ab OR Belorussian:ti,ab OR Belorussia:ti,ab<br>OR Belize:ti,ab OR Bhutan:ti,ab OR Bolivia:ti,ab OR Bosnia:ti,ab OR<br>Herzegovina:ti,ab OR Hercegovina:ti,ab OR Botswana:ti,ab OR Brasil:ti,ab OR<br>Brazil:ti,ab OR Bulgaria:ti,ab OR Burkina Faso:ti,ab OR "Burkina Fasso":ti,ab<br>OR "Upper Volta":ti,ab OR Burundi:ti,ab OR Urundi:ti,ab OR Cambodia:ti,ab OR<br>"Khmer Republic":ti,ab OR Kampuchea:ti,ab OR Cameroon:ti,ab OR<br>Cameroons:ti,ab OR Cameron:ti,ab OR Camerons:ti,ab OR "Cape Verde":ti,ab<br>OR "Central African Republic":ti,ab OR Chad:ti,ab OR Chile:ti,ab OR China:ti,ab<br>OR Colombia:ti,ab OR Comoros:ti,ab OR "Comoro Islands":ti,ab OR<br>Comores:ti,ab OR Mayotte:ti,ab OR Congo:ti,ab OR Zaire:ti,ab OR "Costa<br>Rica":ti,ab OR "Cote d Ivoire":ti,ab OR "Ivory Coast":ti,ab OR Croatia:ti,ab OR<br>Cuba:ti,ab OR Cyprus:ti,ab OR Czechoslovakia:ti,ab OR "Czech Republic":ti,ab<br>OR Slovakia:ti,ab OR "Slovak Republic":ti,ab OR Djibouti:ti,ab OR "French<br>Somaliland":ti,ab OR Dominica:ti,ab OR "Dominican Republic":ti,ab OR "East<br>Timor":ti,ab OR "East Timur":ti,ab OR "Timor Leste":ti,ab OR Ecuador:ti,ab OR<br>Egypt:ti,ab OR "United Arab Republic":ti,ab OR "El Salvador":ti,ab OR<br>Eritrea:ti,ab OR Estonia:ti,ab OR Ethiopia:ti,ab OR Fiji:ti,ab OR Gabon:ti,ab OR<br>"Gabonese Republic":ti,ab OR Gambia:ti,ab OR Gaza:ti,ab OR "Georgia<br>Republic":ti,ab OR "Georgian Republic":ti,ab OR Ghana:ti,ab OR Gold<br>Coast:ti,ab OR Greece:ti,ab OR Grenada:ti,ab OR Guatemala:ti,ab OR<br>Guinea:ti,ab OR Guam:ti,ab OR Guiana:ti,ab OR Guyana:ti,ab OR Haiti:ti,ab OR<br>Honduras:ti,ab OR Hungary:ti,ab OR India:ti,ab OR Maldives:ti,ab OR<br>Indonesia:ti,ab OR Iran:ti,ab OR Iraq:ti,ab OR "Isle of Man":ti,ab OR<br>Jamaica:ti,ab OR Jordan:ti,ab OR Kazakhstan:ti,ab OR Kazakh:ti,ab OR<br>Kenya:ti,ab OR Kiribati:ti,ab OR Korea:ti,ab OR Kosovo:ti,ab OR<br>Kyrgyzstan:ti,ab OR Kirghizia:ti,ab OR "Kyrgyz Republic":ti,ab OR Kirghiz:ti,ab<br>OR Kirgizstan:ti,ab OR Lao PDR:ti,ab OR Laos:ti,ab OR Latvia:ti,ab OR<br>Lebanon:ti,ab OR Lesotho:ti,ab OR Basutoland:ti,ab OR Liberia:ti,ab OR<br>Libya:ti,ab OR Lithuania:ti,ab OR Macedonia:ti,ab OR Madagascar:ti,ab OR<br>"Malagasy Republic":ti,ab OR Malaysia:ti,ab OR Malaya:ti,ab OR Malay:ti,ab OR |

| Community health worker                                                                                                                                                                                                                                                                                                                                                                                                                                             | Program | MCH | LMIC                                                                                                                                                                                                                                                                                                                                                                                                                                                                                                                                                                                                                                                                                                                                                                                                                                                                                                                                                                                                                                                                                                                                                                                                                                                                                                                                                                                                                                                                                                                                                                                                                                                                                                                                                                                                                                                                                                                                                                                                                                                                                                                                                                                                                                                                                                                                                                                                                                                                                                    |
|---------------------------------------------------------------------------------------------------------------------------------------------------------------------------------------------------------------------------------------------------------------------------------------------------------------------------------------------------------------------------------------------------------------------------------------------------------------------|---------|-----|---------------------------------------------------------------------------------------------------------------------------------------------------------------------------------------------------------------------------------------------------------------------------------------------------------------------------------------------------------------------------------------------------------------------------------------------------------------------------------------------------------------------------------------------------------------------------------------------------------------------------------------------------------------------------------------------------------------------------------------------------------------------------------------------------------------------------------------------------------------------------------------------------------------------------------------------------------------------------------------------------------------------------------------------------------------------------------------------------------------------------------------------------------------------------------------------------------------------------------------------------------------------------------------------------------------------------------------------------------------------------------------------------------------------------------------------------------------------------------------------------------------------------------------------------------------------------------------------------------------------------------------------------------------------------------------------------------------------------------------------------------------------------------------------------------------------------------------------------------------------------------------------------------------------------------------------------------------------------------------------------------------------------------------------------------------------------------------------------------------------------------------------------------------------------------------------------------------------------------------------------------------------------------------------------------------------------------------------------------------------------------------------------------------------------------------------------------------------------------------------------------|
| <p>voluntario*:ti,ab OR "nutrition volunteers*":ti,ab OR "village drug-kit manager*":ti,ab OR brigadistas*:ti,ab OR "female community health volunteer*":ti,ab OR "Agente Comunitario de Salud*":ti,ab OR "nutrition worker*":ti,ab OR "community reproductive health worker*":ti,ab OR "community drug distributor*":ti,ab OR "community volunteer*":ti,ab OR "community health advocate*":ti,ab OR "lay health visitor*":ti,ab OR "Promotoras de Salud":ti,ab</p> |         |     | <p>Sabah:ti,ab OR Sarawak:ti,ab OR Malawi:ti,ab OR Nyasaland:ti,ab OR Mali:ti,ab OR Malta:ti,ab OR "Marshall Islands":ti,ab OR Mauritania:ti,ab OR Mauritius:ti,ab OR "Agalega Islands":ti,ab OR Mexico:ti,ab OR Micronesia:ti,ab OR "Middle East":ti,ab OR Moldova:ti,ab OR Moldavia:ti,ab OR Moldovan:ti,ab OR Mongolia:ti,ab OR Montenegro:ti,ab OR Morocco:ti,ab OR Ifni:ti,ab OR Mozambique:ti,ab OR Myanmar:ti,ab OR Myanma:ti,ab OR Burma:ti,ab OR Namibia:ti,ab OR Nepal:ti,ab OR "Netherlands Antilles":ti,ab OR "New Caledonia":ti,ab OR Nicaragua:ti,ab OR Niger:ti,ab OR Nigeria:ti,ab OR "Northern Mariana Islands":ti,ab OR Oman:ti,ab OR Muscat:ti,ab OR Pakistan:ti,ab OR Palau:ti,ab OR Palestine:ti,ab OR Panama:ti,ab OR Paraguay:ti,ab OR Peru:ti,ab OR Philippines:ti,ab OR Philipines:ti,ab OR Phillipines:ti,ab OR Phillippines:ti,ab OR Poland:ti,ab OR Portugal:ti,ab OR "Puerto Rico":ti,ab OR Romania:ti,ab OR Rumania:ti,ab OR Roumania:ti,ab OR Russia:ti,ab OR Russian:ti,ab OR Rwanda:ti,ab OR Ruanda:ti,ab OR "Saint Kitts":ti,ab OR St Kitts:ti,ab OR Nevis:ti,ab OR "Saint Lucia":ti,ab OR "St Lucia":ti,ab OR "Saint Vincent":ti,ab OR "St Vincent":ti,ab OR Grenadines:ti,ab OR Samoa:ti,ab OR "Samoan Islands":ti,ab OR "Navigator Island":ti,ab OR "Navigator Islands":ti,ab OR Sao Tome:ti,ab OR "Saudi Arabia":ti,ab OR Senegal:ti,ab OR Serbia:ti,ab OR Montenegro:ti,ab OR Seychelles:ti,ab OR "Sierra Leone":ti,ab OR Slovenia:ti,ab OR "Sri Lanka":ti,ab OR Ceylon:ti,ab OR "Solomon Islands":ti,ab OR Somalia:ti,ab OR Sudan:ti,ab OR Suriname:ti,ab OR Surinam:ti,ab OR Swaziland:ti,ab OR Syria:ti,ab OR Tajikistan:ti,ab OR Tadjikistan:ti,ab OR Tadjik:ti,ab OR Tanzania:ti,ab OR Thailand:ti,ab OR Togo:ti,ab OR "Togolese Republic":ti,ab OR Tonga:ti,ab OR Trinidad:ti,ab OR Tobago:ti,ab OR Tunisia:ti,ab OR Turkey:ti,ab OR Turkmenistan:ti,ab OR Turkmen:ti,ab OR Uganda:ti,ab OR Ukraine:ti,ab OR Uruguay:ti,ab OR USSR:ti,ab OR "Soviet Union":ti,ab OR "Union of Soviet Socialist Republics":ti,ab OR Uzbekistan:ti,ab OR Uzbek OR Vanuatu:ti,ab OR "New Hebrides":ti,ab OR Venezuela:ti,ab OR Vietnam:ti,ab OR Viet Nam:ti,ab OR West Bank:ti,ab OR Yemen:ti,ab OR Yugoslavia:ti,ab OR Zambia:ti,ab OR Zimbabwe:ti,ab OR Rhodesia:ti,ab OR "Developing Country"/de OR Africa/exp OR Asia/exp OR Caribbean/exp OR "West Indies"/exp OR "South America"/exp OR "Latin America"/exp OR "Central America"/exp OR "Developing Countri*":ti,ab</p> |



**SCOPUS**

| Community health worker                                                                                                                                                                                                                                                                                                                                                                                                                                                                                                                                                                                                                                                                                                                                                                                                                                                                                                                                                                                                                                                                                                                                                                                             | Program                                                                                     | MCH                                                                                                                                                                                                                                            | LMIC                                                                                                                                                                                                                                                                                                                                                                                                                                                                                                                                                                                                                                                                                                                                                                                                                                                                                                                                                                                                                                                                                                                                                                                                                                                                                                                                                                                                                                                                                                                                                                                                                                                                                                                                                                                                                                                                                                                                                                                                                                                                   |
|---------------------------------------------------------------------------------------------------------------------------------------------------------------------------------------------------------------------------------------------------------------------------------------------------------------------------------------------------------------------------------------------------------------------------------------------------------------------------------------------------------------------------------------------------------------------------------------------------------------------------------------------------------------------------------------------------------------------------------------------------------------------------------------------------------------------------------------------------------------------------------------------------------------------------------------------------------------------------------------------------------------------------------------------------------------------------------------------------------------------------------------------------------------------------------------------------------------------|---------------------------------------------------------------------------------------------|------------------------------------------------------------------------------------------------------------------------------------------------------------------------------------------------------------------------------------------------|------------------------------------------------------------------------------------------------------------------------------------------------------------------------------------------------------------------------------------------------------------------------------------------------------------------------------------------------------------------------------------------------------------------------------------------------------------------------------------------------------------------------------------------------------------------------------------------------------------------------------------------------------------------------------------------------------------------------------------------------------------------------------------------------------------------------------------------------------------------------------------------------------------------------------------------------------------------------------------------------------------------------------------------------------------------------------------------------------------------------------------------------------------------------------------------------------------------------------------------------------------------------------------------------------------------------------------------------------------------------------------------------------------------------------------------------------------------------------------------------------------------------------------------------------------------------------------------------------------------------------------------------------------------------------------------------------------------------------------------------------------------------------------------------------------------------------------------------------------------------------------------------------------------------------------------------------------------------------------------------------------------------------------------------------------------------|
| <p>“Health Auxiliary” OR “community health worker*” OR “community health aide*” OR “village health worker*” OR “barefoot doctor*” OR “family planning personnel*” OR “health extension worker*” OR “lady health worker*” OR “community health agent*” OR “Shasthyo Sebika*” OR “community nutrition worker*” OR “maternal health worker*” OR “voluntary Malaria worker*” OR “village malaria worker*” OR Raedat* OR “postnatal support worker*” OR “mental health worker*” OR “mother coordinator*” OR “rural health worker*” OR “village health promoter*” OR accompagnateur* OR “Saksham Sahaya*” OR “anganwandi worker*” OR “accredited social health activist*” OR “community-based worker*” OR “community health volunteer*” OR “village health guide*” OR “maternal and child health promotion worker*” OR “maternal child health worker*” OR “kader posyandu*” OR behvarz* OR “village health helper*” OR “colaborador voluntario*” OR “nutrition volunteers*” OR “village drug-kit manager*” OR brigadistas* OR “female community health volunteer*” OR “Agente Comunitario de Salud*” OR “nutrition worker*” OR “community reproductive health worker*” OR “community drug distributor*” OR “community</p> | <p>Program OR programs OR programme OR programmes OR initiative* OR project OR projects</p> | <p>“Maternal child health care”/de OR “Maternal Welfare” OR “child health” OR “child care” OR “child welfare” OR “maternal-child health services” OR “child health services” OR “maternal child health” OR “maternal newborn child health”</p> | <p>Afghanistan OR Albania OR Algeria OR Angola OR Antigua OR Barbuda OR Argentina OR Armenia OR Armenian OR Aruba OR Azerbaijan OR Bahrain OR Bangladesh OR Barbados OR Benin OR Byelarus OR Byelorussian OR Belarus OR Belorussian OR Belorussia OR Belize OR Bhutan OR Bolivia OR Bosnia OR Herzegovina OR Hercegovina OR Botswana OR Brasil OR Brazil OR Bulgaria OR Burkina Faso OR “Burkina Fasso” OR “Upper Volta” OR Burundi OR Urundi OR Cambodia OR “Khmer Republic” OR Kampuchea OR Cameroon OR Camerons OR Cameroon OR Camerons OR “Cape Verde” OR “Central African Republic” OR Chad OR Chile OR China OR Colombia OR Comoros OR “Comoro Islands” OR Comores OR Mayotte OR Congo OR Zaire OR “Costa Rica” OR “Cote d'Ivoire” OR “Ivory Coast” OR Croatia OR Cuba OR Cyprus OR Czechoslovakia OR “Czech Republic” OR Slovakia OR “Slovak Republic” OR Djibouti OR “French Somaliland” OR Dominica OR “Dominican Republic” OR “East Timor” OR “East Timur” OR “Timor Leste” OR Ecuador OR Egypt OR “United Arab Republic” OR “El Salvador” OR Eritrea OR Estonia OR Ethiopia OR Fiji OR Gabon OR “Gabonese Republic” OR Gambia OR Gaza OR “Georgia Republic” OR “Georgian Republic” OR Ghana OR Gold Coast OR Greece OR Grenada OR Guatemala OR Guinea OR Guam OR Guiana OR Guyana OR Haiti OR Honduras OR Hungary OR India OR Maldives OR Indonesia OR Iran OR Iraq OR “Isle of Man” OR Jamaica OR Jordan OR Kazakhstan OR Kazakh OR Kenya OR Kiribati OR Korea OR Kosovo OR Kyrgyzstan OR Kirghizia OR “Kyrgyz Republic” OR Kirghiz OR Kirgizstan OR Lao PDR OR Laos OR Latvia OR Lebanon OR Lesotho OR Basutoland OR Liberia OR Libya OR Lithuania OR Macedonia OR Madagascar OR “Malagasy Republic” OR Malaysia OR Malaya OR Malay OR Sabah OR Sarawak OR Malawi OR Nyasaland OR Mali OR Malta OR “Marshall Islands” OR Mauritania OR Mauritius OR “Agalega Islands” OR Mexico OR Micronesia OR “Middle East” OR Moldova OR Moldavia OR Moldovan OR Mongolia OR Montenegro OR Morocco OR Ifni OR Mozambique OR Myanmar OR Myanma OR Burma OR Namibia</p> |

| Community health worker                                                                       | Program | MCH | LMIC                                                                                                                                                                                                                                                                                                                                                                                                                                                                                                                                                                                                                                                                                                                                                                                                                                                                                                                                                                                                                                                                                                                                                                                                                                                                                                                                                                                                                                         |
|-----------------------------------------------------------------------------------------------|---------|-----|----------------------------------------------------------------------------------------------------------------------------------------------------------------------------------------------------------------------------------------------------------------------------------------------------------------------------------------------------------------------------------------------------------------------------------------------------------------------------------------------------------------------------------------------------------------------------------------------------------------------------------------------------------------------------------------------------------------------------------------------------------------------------------------------------------------------------------------------------------------------------------------------------------------------------------------------------------------------------------------------------------------------------------------------------------------------------------------------------------------------------------------------------------------------------------------------------------------------------------------------------------------------------------------------------------------------------------------------------------------------------------------------------------------------------------------------|
| volunteer** OR "community health advocate*" OR "lay health visitor*" OR "Promotoras de Salud" |         |     | OR Nepal OR "Netherlands Antilles" OR "New Caledonia" OR Nicaragua OR Niger OR Nigeria OR "Northern Mariana Islands" OR Oman OR Muscat OR Pakistan OR Palau OR Palestine OR Panama OR Paraguay OR Peru OR Philippines OR Philipines OR Phillipines OR Phillippines OR Poland OR Portugal OR "Puerto Rico" OR Romania OR Rumania OR Roumania OR Russia OR Russian OR Rwanda OR Ruanda OR "Saint Kitts" OR St Kitts OR Nevis OR "Saint Lucia" OR "St Lucia" OR "Saint Vincent" OR "St Vincent" OR Grenadines OR Samoa OR "Samoan Islands" OR "Navigator Island" OR "Navigator Islands" OR Sao Tome OR "Saudi Arabia" OR Senegal OR Serbia OR Montenegro OR Seychelles OR "Sierra Leone" OR Slovenia OR "Sri Lanka" OR Ceylon OR "Solomon Islands" OR Somalia OR Sudan OR Suriname OR Surinam OR Swaziland OR Syria OR Tajikistan OR Tadjhikistan OR Tadjikistan OR Tadzhhik OR Tanzania OR Thailand OR Togo OR "Togolese Republic" OR Tonga OR Trinidad OR Tobago OR Tunisia OR Turkey OR Turkmenistan OR Turkmen OR Uganda OR Ukraine OR Uruguay OR USSR OR "Soviet Union" OR "Union of Soviet Socialist Republics" OR Uzbekistan OR Uzbek OR Vanuatu OR "New Hebrides" OR Venezuela OR Vietnam OR Viet Nam OR West Bank OR Yemen OR Yugoslavia OR Zambia OR Zimbabwe OR Rhodesia OR "Developing Country" OR Africa OR Asia OR Caribbean OR "West Indies" OR "South America" OR "Latin America" OR "Central America" OR "Developing Countr**" |

## Appendix II: Data Charting Form

|                                                                                                                                                               |                                                                                                                                                                                    |
|---------------------------------------------------------------------------------------------------------------------------------------------------------------|------------------------------------------------------------------------------------------------------------------------------------------------------------------------------------|
| <b>Scoping Review Title:</b> Application of Primary Health Care Principles in National Community Health Worker Programs in Low- and Middle –Income Countries? |                                                                                                                                                                                    |
| Data charted by:                                                                                                                                              |                                                                                                                                                                                    |
| Date of data charting:                                                                                                                                        |                                                                                                                                                                                    |
| <b>Study Details and Characteristics</b>                                                                                                                      |                                                                                                                                                                                    |
| Study citation details (author, year, title, journal, volume, issue, pages)                                                                                   |                                                                                                                                                                                    |
| Country of origin                                                                                                                                             |                                                                                                                                                                                    |
| Study objective / aim                                                                                                                                         |                                                                                                                                                                                    |
| Type of Study                                                                                                                                                 | Qualitative / Quantitative                                                                                                                                                         |
| Methods:                                                                                                                                                      |                                                                                                                                                                                    |
| Study Setting:                                                                                                                                                |                                                                                                                                                                                    |
| <b>CHW Program Details</b>                                                                                                                                    |                                                                                                                                                                                    |
| Name of the CHW Program                                                                                                                                       |                                                                                                                                                                                    |
| Objective of the CHW Program                                                                                                                                  |                                                                                                                                                                                    |
| Year the program started                                                                                                                                      |                                                                                                                                                                                    |
| End date                                                                                                                                                      |                                                                                                                                                                                    |
| Implemented by                                                                                                                                                |                                                                                                                                                                                    |
| Funded by                                                                                                                                                     |                                                                                                                                                                                    |
| <b>Details / Results charted from the Study (in relation to the concept of the scoping review)</b>                                                            |                                                                                                                                                                                    |
| Which PHC principle is reflected in the reported objective of the national program?                                                                           | <ul style="list-style-type: none"> <li>• Universal access / Equity</li> <li>• Community participation</li> <li>• Intersectoral collaboration</li> <li>• Appropriateness</li> </ul> |
| How are they implementing the PHC principle (s)?                                                                                                              |                                                                                                                                                                                    |
| Stated outcome / achievement of the CHW program with reference to PHC principle (s)                                                                           |                                                                                                                                                                                    |
| Key findings of the article                                                                                                                                   |                                                                                                                                                                                    |
| <b>Characteristics of CHWs</b>                                                                                                                                |                                                                                                                                                                                    |
| Key role of CHWs stated                                                                                                                                       |                                                                                                                                                                                    |
| Nomenclature of CHWs                                                                                                                                          |                                                                                                                                                                                    |
| Gender                                                                                                                                                        |                                                                                                                                                                                    |
| Employment status                                                                                                                                             |                                                                                                                                                                                    |
| Pre-service training                                                                                                                                          |                                                                                                                                                                                    |
| Catchment area                                                                                                                                                |                                                                                                                                                                                    |
| Additional notes:                                                                                                                                             |                                                                                                                                                                                    |
|                                                                                                                                                               |                                                                                                                                                                                    |
